# Supplementary material for: Deletion or Inhibition of Astrocytic Transglutaminase 2 Promotes Functional Recovery after Spinal Cord Injury
Source: MDPI journal article supplement (doi:10.3390/cells10112942), 2021-10-29
Supplement: s1 [file s1]

## Supplemental Figure S1

### Supplementary Code 1 & 2.ijm

```
1 //These are the variables to change for the threshold cell counts.
2 //These are the variables used for the NeuN cell count.
3 //They real values must be empirically determined by user.
4
5
6 lowT = 0;
7 upperT = 70;
8 lowerS= 25;
9 upperS= 2000;
10
11
12
13 dir = getDirectory("choose a Directory")
14 list = getFileList(dir);
15
16 Dialog.create("threshold");
17 Dialog.addNumber("Lower", lowT);
18 Dialog.addNumber("Upper", upperT);
19 Dialog.show();
20 //setThreshold(lowT, upperT);
21
22 for (i = 0; i < list.length; i++){
23     if(File.isDirectory(dir+list[i])){}
24     else {
25         open(dir+list[i]);
26         //run("Split Channels");
27         //close();
28         //close("\\Others");
29
30         getDimensions(width, height, channels, slices, frames);
31         title = File.nameWithoutExtension;
32         if (slices > 1){
33             run("Z Project..."); //error add code max int
34         }
35         setThreshold(lowT, upperT);
36         run("Threshold");
37         run("Invert");
38         run("Analyze Particles...", "size="+ lowerS + "-" + upperS + " show=Overlay summarize in_situ include_holes");
39         run("Close All");
40     }
41 }
42
43
```

```
1 //These are the variables used to measure GFAP fluorescence intensity.
2 //They real values must be empirically determined by user
3
4 makeRectangle(12, 18, 2736, 2562);
5 waitForUser;
6 run("Crop");
7 setThreshold(0, 80);
8 run("Create Selection");
9 run("Measure"); // Make sure you have area integrated intensity and mean grey value selected
10
```

Supplemental code for Fiji Image analysis used for immunofluorescence quantification.

Supplemental Figure S2

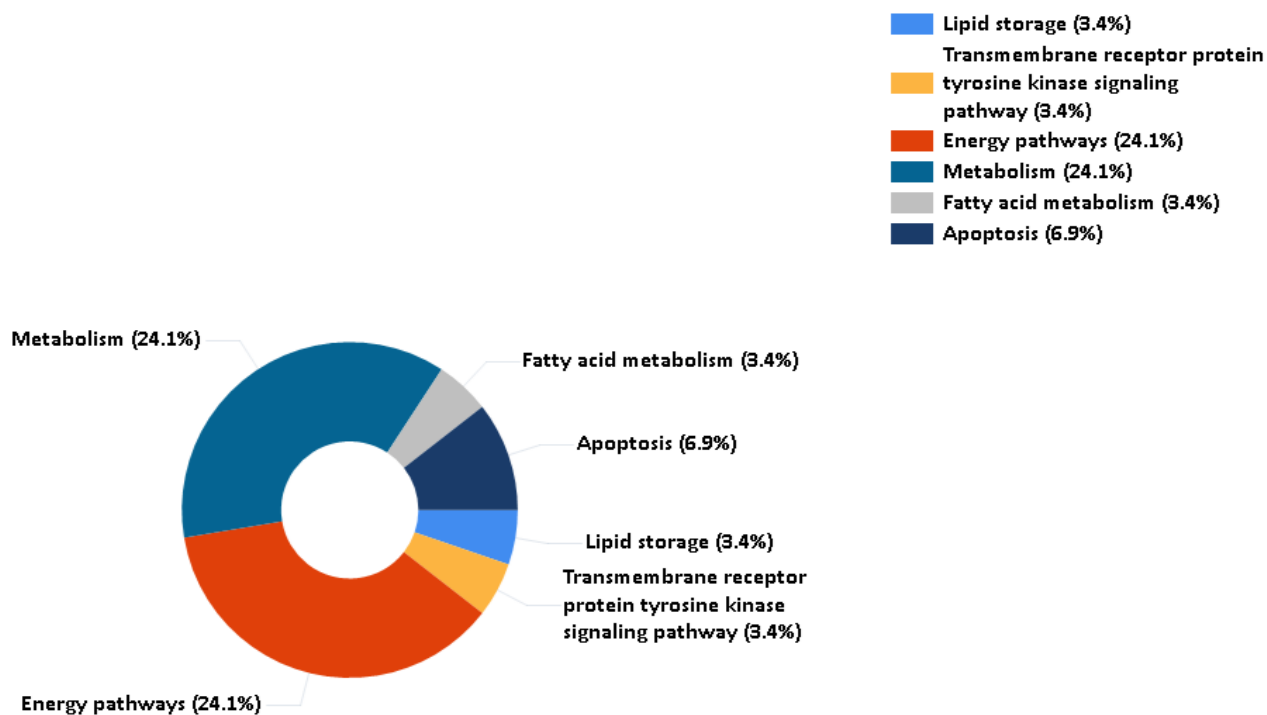

Functional analysis of genes that are significantly upregulated in GFAP-Cre<sup>+</sup>/TG2fl/fl mice three days post injury using FunRich (<http://www.funrich.org>).

**Supplemental Table S1**

| <b>ANTIBODY</b>                     | <b>SOURCE</b>   | <b>CATALOGUE NUMBER</b> |
|-------------------------------------|-----------------|-------------------------|
| rabbit anti-GFAP                    | Dako            | Z033401-2               |
| goat anti-GFAP                      | Novus           | NB100-53809             |
| rabbit anti-SOX9                    | Millipore-Sigma | AB5535                  |
| chicken anti-NeuN                   | Millipore-Sigma | ABN91                   |
| Anti-NG2, Alexa Fluor 488 conjugate | Millipore-Sigma | AB5320A4                |
| donkey anti-goat Alexa Fluor 488    | Invitrogen      | A-11055                 |
| goat anti-chicken Alexa Fluor 488   | Invitrogen      | A32931                  |
| goat anti-rabbit Alexa Fluor 647    | Invitrogen      | A32733                  |
| donkey anti-goat Alexa Fluor 647    | Invitrogen      | A32849                  |
| donkey anti-rabbit Alexa Fluor 647  | Invitrogen      | A48258                  |

**Supplemental Table S2**

| <b>Target</b>                            | <b>Forward primer</b>        | <b>Reverse primer</b>        |
|------------------------------------------|------------------------------|------------------------------|
| Lipoprotein lipase                       | 5'GGGAGTTTGGCTCCAGAGTT T3'   | 5'TGTGTCTTCAGGGGTCCTTA G3'   |
| Fatty acid binding protein 4             | 5'AAGGTGAAGAGCATCATAAC CCT3' | 5'TCACGCCTTTCATAACACAT TCC3' |
| Perilipin                                | 5'GGGACCTGTGAGTGCTTCC3 '     | 5'GTATTGAAGAGCCGGGATC TTTT3' |
| Glyceraldehyde-3-Phosphate Dehydrogenase | 5'ATGGGACGATGCTGGTACTA G3'   | 5'TGCTGACAACCTTGAGTGAA AT3'  |

Supplemental Table S3

**Genes that are significantly different in spinal cords of  
GFAP-Cre+/-TG2fl/fl mice compared to TG2fl/fl mice 3 days postinjury**

| <b>Gene</b> | <b>BaseMean</b> | <b>log2FoldChange</b> | <b>stat</b> | <b>pvalue</b> | <b>padj</b> |
|-------------|-----------------|-----------------------|-------------|---------------|-------------|
| Ucp1        | 1839.018        | 3.204                 | 7.039       | 1.94E-12      | 5.16E-08    |
| Pck1        | 544.603         | 3.23                  | 6.864       | 6.69E-12      | 8.91E-08    |
| Cidec       | 379.985         | 3.29                  | 6.378       | 1.80E-10      | 1.60E-06    |
| Plin1       | 229.471         | 3.241                 | 6.119       | 9.43E-10      | 6.29E-06    |
| Adipoq      | 165.857         | 3.359                 | 6.066       | 1.31E-09      | 7.01E-06    |
| Tmem79      | 76.832          | 2.268                 | 5.739       | 9.53E-09      | 4.23E-05    |
| Trarg1      | 313.398         | 2.7                   | 5.27        | 1.37E-07      | 0.00052     |
| Tmem45b     | 47.06           | 2.373                 | 5.203       | 1.97E-07      | 0.000655    |
| Hp          | 2084.877        | 3.129                 | 5.149       | 2.62E-07      | 0.000777    |
| Ces1d       | 49.255          | 2.407                 | 5.07        | 3.98E-07      | 0.001062    |
| Cidea       | 585.054         | 2.679                 | 4.897       | 9.72E-07      | 0.002355    |
| Retn        | 23.804          | 2.775                 | 4.865       | 1.14E-06      | 0.002539    |
| Fabp4       | 4711.471        | 2.878                 | 4.843       | 1.28E-06      | 0.002621    |
| Cd300lg     | 111.464         | 2.537                 | 4.777       | 1.78E-06      | 0.003165    |
| Adtrp       | 82.11           | 2.817                 | 4.789       | 1.67E-06      | 0.003165    |
| Lpl         | 2917.602        | 2.565                 | 4.753       | 2.00E-06      | 0.003334    |
| Btnl9       | 31.183          | 2.496                 | 4.611       | 4.01E-06      | 0.006283    |
| Aqp7        | 47.057          | 2.51                  | 4.584       | 4.57E-06      | 0.006761    |
| Elovl3      | 157.437         | 2.352                 | 4.495       | 6.94E-06      | 0.009743    |
| Th          | 109.153         | 1.704                 | 4.433       | 9.29E-06      | 0.012381    |
| Ctcflos     | 55.689          | 2.004                 | 4.417       | 1.00E-05      | 0.012714    |
| Cyp2e1      | 67.719          | 2.278                 | 4.288       | 1.81E-05      | 0.021228    |
| Cfd         | 219.85          | 2.35                  | 4.285       | 1.83E-05      | 0.021228    |
| Adig        | 27.797          | 2.314                 | 4.244       | 2.20E-05      | 0.024394    |
| Ntrk1       | 62.048          | 1.941                 | 4.216       | 2.49E-05      | 0.02455     |
| Otop1       | 58.498          | 2.495                 | 4.224       | 2.40E-05      | 0.02455     |
| Pirt        | 238.056         | 2.063                 | 4.218       | 2.47E-05      | 0.02455     |
| Acaa1b      | 104.13          | 2.317                 | 4.154       | 3.27E-05      | 0.031167    |
| Alkal2      | 19.039          | 1.863                 | 4.141       | 3.46E-05      | 0.031789    |
| Slc6a2      | 25.009          | 2.4                   | 4.072       | 4.66E-05      | 0.041444    |
| Slc18a2     | 18.511          | 2.269                 | 4.063       | 4.85E-05      | 0.041741    |
| Cyp2f2      | 10.428          | 2.267                 | 4.032       | 5.54E-05      | 0.045051    |
| C7          | 19.398          | 2.371                 | 4.03        | 5.58E-05      | 0.045051    |
| Chad        | 48.389          | 1.949                 | 4.012       | 6.01E-05      | 0.047116    |
| Acot2       | 246.088         | 1.395                 | 3.989       | 6.64E-05      | 0.049205    |
| 2010003K1   | 17.845          | 2.458                 | 3.989       | 6.63E-05      | 0.049205    |
| Ccdc80      | 318.311         | 1.054                 | 3.98        | 6.89E-05      | 0.049669    |

## Supplemental Table S4

| Biological Process                                                                        | Adjusted P-v | Odds Ratio  | Combined Score | Genes                     |
|-------------------------------------------------------------------------------------------|--------------|-------------|----------------|---------------------------|
| brown fat cell differentiation (GO:0050873)                                               | 1.52E-04     | 352.2       | 5262.453429    | ADIPOQ;UCP1;ADIG          |
| long-chain fatty acid metabolic process (GO:0001676)                                      | 0.00268941   | 30.50863061 | 336.1408856    | ELOVL3;ACOT2;ADTRP;CYP2E1 |
| response to insulin (GO:0032868)                                                          | 0.00268941   | 30.12575758 | 330.4923304    | TRARG1;ADIPOQ;OTOP1;PCK1  |
| positive regulation of cold-induced thermogenesis (GO:0120162)                            | 0.00356049   | 25.89768654 | 269.3920495    | FABP4;ADIPOQ;ELOVL3;UCP1  |
| cellular response to peptide hormone stimulus (GO:0071375)                                | 0.00403567   | 23.60190137 | 237.2875724    | TRARG1;ADIPOQ;OTOP1;PCK1  |
| positive regulation of metabolic process (GO:0009893)                                     | 0.00431888   | 22.07839867 | 216.4478246    | FABP4;ADIPOQ;ELOVL3;UCP1  |
| synaptic transmission, dopaminergic (GO:0001963)                                          | 0.00465807   | 228.0914286 | 2183.712167    | TH;SLC6A2                 |
| cellular response to insulin stimulus (GO:0032869)                                        | 0.00474921   | 19.23684848 | 178.6773171    | TRARG1;ADIPOQ;OTOP1;PCK1  |
| monoamine transport (GO:0015844)                                                          | 0.00474921   | 190.0666667 | 1765.211478    | SLC6A2;SLC18A2            |
| response to glucose (GO:0009749)                                                          | 0.00474921   | 38.20396419 | 351.3922501    | ADIPOQ;LPL;PCK1           |
| positive regulation of sequestering of triglyceride (GO:0010890)                          | 0.00506972   | 162.9061224 | 1472.211648    | CIDEA;LPL                 |
| fat cell differentiation (GO:0045444)                                                     | 0.00653855   | 31.93796791 | 277.6550177    | ADIPOQ;UCP1;ADIG          |
| regulation of biosynthetic process (GO:0009889)                                           | 0.00653855   | 126.6920635 | 1091.539997    | UCP1;PCK1                 |
| fatty acid biosynthetic process (GO:0006633)                                              | 0.0102331    | 25.81531142 | 208.9406809    | ELOVL3;LPL;CYP2E1         |
| regulation of sequestering of triglyceride (GO:0010889)                                   | 0.01076804   | 87.69230769 | 699.2344145    | CIDEA;LPL                 |
| regulation of fat cell differentiation (GO:0045598)                                       | 0.01227769   | 22.78762414 | 176.4266626    | ADIPOQ;LPL;ADIG           |
| cellular response to fatty acid (GO:0071398)                                              | 0.01227769   | 75.99238095 | 586.4606264    | UCP1;LPL                  |
| response to fatty acid (GO:0070542)                                                       | 0.01454584   | 67.04537815 | 502.2155781    | UCP1;LPL                  |
| positive regulation of lipid storage (GO:0010884)                                         | 0.01688376   | 59.98195489 | 437.1224949    | CIDEA;LPL                 |
| lipid droplet organization (GO:0034389)                                                   | 0.017623     | 56.98       | 409.8811226    | CIDEA;CIDEA               |
| triglyceride catabolic process (GO:0019433)                                               | 0.01836088   | 54.26394558 | 385.4700929    | FABP4;LPL                 |
| response to hexose (GO:0009746)                                                           | 0.02073383   | 49.54037267 | 343.5896724    | ADIPOQ;LPL                |
| negative regulation of protein transport (GO:0051224)                                     | 0.02146006   | 47.47380952 | 325.5122514    | ADIPOQ;ADTRP              |
| regulation of reactive oxygen species biosynthetic process (GO:0000000)                   | 0.0238641    | 43.81758242 | 293.9252254    | UCP1;SLC18A2              |
| regulation of macrophage derived foam cell differentiation (GO:0000000)                   | 0.02691638   | 39.27881773 | 255.4802892    | ADIPOQ;LPL                |
| fatty acid metabolic process (GO:0006631)                                                 | 0.02691638   | 14.4691298  | 93.61217318    | ADIPOQ;ACOT2;LPL          |
| regulation of tumor necrosis factor production (GO:0032680)                               | 0.02691638   | 14.4691298  | 93.61217318    | ADIPOQ;CIDEA;LPL          |
| very long-chain fatty acid metabolic process (GO:0000038)                                 | 0.02840625   | 36.74101382 | 234.3909225    | ELOVL3;ACOT2              |
| acylglycerol catabolic process (GO:0046464)                                               | 0.02980736   | 34.51082251 | 216.1207577    | FABP4;LPL                 |
| regulation of lipid biosynthetic process (GO:0046890)                                     | 0.02980736   | 34.51082251 | 216.1207577    | ADIPOQ;PCK1               |
| proton transmembrane transport (GO:1902600)                                               | 0.03221294   | 32.5355102  | 200.1585487    | UCP1;OTOP1                |
| negative regulation of cell-cell adhesion (GO:0022408)                                    | 0.03708499   | 29.19267399 | 173.6566538    | ADIPOQ;ADTRP              |
| hexose metabolic process (GO:0019318)                                                     | 0.03708499   | 29.19267399 | 173.6566538    | ADIPOQ;PCK1               |
| negative regulation of tumor necrosis factor production (GO:0032680)                      | 0.04516859   | 25.86883117 | 148.0109909    | ADIPOQ;CIDEA              |
| negative regulation of cold-induced thermogenesis (GO:0120163)                            | 0.04577499   | 25.29269841 | 143.6441165    | ADIPOQ;CIDEA              |
| negative regulation of tumor necrosis factor superfamily cytokine production (GO:0000000) | 0.04638449   | 24.74161491 | 139.4901066    | ADIPOQ;CIDEA              |
| positive regulation of multicellular organismal process (GO:0051224)                      | 0.04649415   | 6.974851151 | 39.11575762    | FABP4;ADIPOQ;ELOVL3;UCP1  |
| positive regulation of fat cell differentiation (GO:0045600)                              | 0.04822795   | 23.22332362 | 128.1662168    | LPL;ADIG                  |
| inositol lipid-mediated signaling (GO:0048017)                                            | 0.04822795   | 23.22332362 | 128.1662168    | NTRK1;PIRT                |

**Gene ontology pathway analysis identifies a preponderance of lipid biosynthetic pathways among differentially expressed genes in mice lacking astrocytic TG2.** 22 out of 39 GO terms with an adjusted p-value of less than 0.05 are involved with lipid biosynthetic pathways and storage (highlighted in yellow). Enrichr, GO Biological Process 2021.
